# Supplementary material for: Impact of a rigid backbone on the structure of an agostically-stabilised dialkylstannylene: isolation of an unusual bridged stannyl–stannylene
Source: Royal Society of Chemistry journal article supplement (doi:10.1039/c4cc08740b), 2014-11-21
Supplement: c4cc08740b1.pdf [file c4cc08740b1.pdf]

# Impact of a Rigid Backbone on the Structure of an Agostically-Stabilized Dialkylstannylene: Isolation of an Unusual Bridged Stannyl-Stannylene

Keith Izod,<sup>\*a</sup> Casey M. Dixon,<sup>a</sup> Ross W. Harrington,<sup>a</sup> Michael R. Probert<sup>a</sup>

## SUPPLEMENTARY INFORMATION

### Contents:

- 1.1 Experimental procedures
- 1.2 Crystal structure determination of **5**
- 2.1 DFT calculations
- 2.2 Atomic coordinates and energy of **5'**
- 2.3 Atomic coordinates and energy of *rac*-**6'**
- 2.4 Atomic coordinates and energy of *meso*-**6'**

## 1.1 Experimental procedures

All manipulations were carried out using standard Schlenk techniques under an atmosphere of dry nitrogen. Toluene, THF and light petroleum (b.p. 40-60 °C) were dried prior to use by distillation under nitrogen from sodium, potassium or sodium/potassium alloy, respectively. THF was stored over activated 4A molecular sieves; all other solvents were stored over a potassium film. Deuterated THF was distilled from potassium and was deoxygenated by three freeze-pump-thaw cycles and stored over activated 4A molecular sieves. 1,2-C<sub>6</sub>H<sub>4</sub>{CH<sub>2</sub>P(BH<sub>3</sub>)C<sub>y</sub>2}<sub>2</sub><sup>S1</sup> and Cp<sub>2</sub>Sn<sup>S2</sup> were prepared by previously published procedures; *n*-butyllithium was purchased from Aldrich as a 2.5 M solution in hexanes. All other compounds were used as supplied by the manufacturer.

<sup>1</sup>H NMR spectra were recorded on a JEOL ECS500 spectrometer operating at 500.16 MHz, respectively and chemical shifts are quoted in ppm relative to tetramethylsilane. <sup>31</sup>P{<sup>1</sup>H}, <sup>11</sup>B{<sup>1</sup>H} and <sup>119</sup>Sn{<sup>1</sup>H} NMR spectra were recorded on a JEOL ECS400 spectrometer operating at 202.47, 160.47 and 186.51 MHz, respectively; chemical shifts are quoted in ppm relative to external 85% H<sub>3</sub>PO<sub>4</sub>, BF<sub>3</sub>.Et<sub>2</sub>O, and Me<sub>4</sub>Sn, respectively. Elemental analyses were obtained by the Elemental Analysis Service of London Metropolitan University.

**Synthesis of 5:** To a solution of 1,2-C<sub>6</sub>H<sub>4</sub>{CH<sub>2</sub>PCy<sub>2</sub>(BH<sub>3</sub>)<sub>2</sub> (0.50 g, 1.17 mmol) in THF (20 ml) was added *n*-BuLi (0.94 ml of a 2.5M solution in hexanes, 2.34 mmol) and this solution was stirred for 30 mins at room temperature. The solvent was removed *in vacuo* to yield a dark orange oil, which was dissolved in toluene (20 ml) and added, dropwise, to a solution of Cp<sub>2</sub>Sn (0.29 g, 1.17 mmol) in toluene (20 ml); this mixture was stirred for 45 mins at room temperature. The pale solids were removed by filtration and the filtrate was concentrated to approx. 10 ml and cooled to -20°C. After one week yellow crystals of **5** were isolated and washed with light petroleum (3 x 5ml). Isolated yield: 0.23 g, 28%. The solvent of crystallisation is gradually lost under vacuum and so is diminished in intensity in the <sup>1</sup>H NMR spectrum; this solvent was not observed in the elemental analyses of **5**, the sample for which was exposed to vacuum for an extended period. Anal. Calcd. for C<sub>64</sub>H<sub>112</sub>B<sub>4</sub>P<sub>4</sub>Sn<sub>2</sub> (1286.1; molecular formula without solvent of crystallisation): C 59.77, H 8.78%. Found: C 59.68, H 8.88%. <sup>1</sup>H NMR (*d*<sub>8</sub>-THF): δ ~0.5-2.67 (m, ca. 107H, Cy+BH<sub>3</sub>+CHSn+PhMe), 6.58 (m, 1H, ArH), 6.79 (m, 1H, ArH), 7.00 (m, 2H, ArH), 7.07-7.19 (m, ca. 5H, PhMe), 7.28 (m, 2H, ArH), 7.96 (m, 1H, ArH), 8.03 (m, 1H, ArH). <sup>11</sup>B{<sup>1</sup>H} NMR (*d*<sub>8</sub>-THF): δ

-43.5, -38.8.  $^{31}\text{P}\{^1\text{H}\}$  NMR ( $d_8$ -THF):  $\delta$  27.4, 28.6, 30.0, 35.4.  $^{119}\text{Sn}\{^1\text{H}\}$  ( $d_8$ -THF):  $\delta$  -103 (br, FWHM = 770 Hz), 339 (br, FWHM = 480 Hz).

## 1.2 Crystal Structure determination of 5:

Measurements were made at 150 K on an Oxford Diffraction (Agilent Technologies) Gemini A Ultra diffractometer, using MoK $\alpha$  radiation ( $\lambda = 0.71073 \text{ \AA}$ ). Cell parameters were refined from the observed positions of all strong reflections. Intensities were corrected semi-empirically for absorption, based on symmetry-equivalent and repeated reflections. The structures were solved by direct methods and refined on  $F^2$  values for all unique data. All non-hydrogen atoms were refined anisotropically, and C-bound H atoms were constrained with a riding model, while B-bound H atoms were freely refined;  $U(\text{H})$  was set at 1.2 (1.5 for methyl groups) times  $U_{\text{eq}}$  for the parent C atom. Disorder in the solvent of crystallization was successfully modeled with the aid of restraints and constraints on geometry and displacement parameters. Data were collected and processed using CrysAlisPro and the structure was solved and refined using the Olex2 interface to the SHELXTL suite of programs.<sup>S3</sup>

|                                     |                                                                                                                                                                    |
|-------------------------------------|--------------------------------------------------------------------------------------------------------------------------------------------------------------------|
| Chemical formula                    | $\text{C}_{64}\text{H}_{112}\text{B}_4\text{P}_4\text{Sn}_2 \cdot 1.5\text{C}_7\text{H}_8$                                                                         |
| Formula weight                      | 1424.36                                                                                                                                                            |
| Temperature                         | 150(2) K                                                                                                                                                           |
| Radiation, wavelength               | MoK $\alpha$ , 0.71073 $\text{\AA}$                                                                                                                                |
| Crystal system, space group         | monoclinic, $P2_1/c$                                                                                                                                               |
| Unit cell parameters                | $a = 14.08850(10) \text{ \AA}$ $\alpha = 90^\circ$<br>$b = 26.5770(2) \text{ \AA}$ $\beta = 95.2730(10)^\circ$<br>$c = 20.0509(2) \text{ \AA}$ $\gamma = 90^\circ$ |
| Cell volume                         | 7475.89(11) $\text{\AA}^3$                                                                                                                                         |
| Z                                   | 2                                                                                                                                                                  |
| Absorption coefficient $\mu$        | 0.793 $\text{mm}^{-1}$                                                                                                                                             |
| Crystal colour and size             | yellow, $0.30 \times 0.30 \times 0.10 \text{ mm}^3$                                                                                                                |
| Reflections collected               | 108054                                                                                                                                                             |
| Independent reflections             | 17595 ( $R_{\text{int}} = 0.0359$ )                                                                                                                                |
| Reflections with $F^2 > 2\sigma$    | 15111                                                                                                                                                              |
| Absorption correction               | semi-empirical from equivalents                                                                                                                                    |
| Min. and max. transmission          | 0.7970 and 0.9250                                                                                                                                                  |
| Structure solution                  | direct methods                                                                                                                                                     |
| Refinement method                   | Full-matrix least-squares on $F^2$                                                                                                                                 |
| Data / restraints / parameters      | 17595 / 0 / 767                                                                                                                                                    |
| Final R indices [ $F^2 > 2\sigma$ ] | $R1 = 0.028$ , $wR2 = 0.056$                                                                                                                                       |
| R indices (all data)                | $R1 = 0.039$ , $wR2 = 0.060$                                                                                                                                       |
| Goodness-of-fit on $F^2$            | 1.051                                                                                                                                                              |
| Largest diff. peak and hole         | 0.67 and $-0.55 \text{ e \AA}^{-3}$                                                                                                                                |

## 2.1 DFT calculations:

Geometry optimizations on the gas-phase molecules were performed with the Gaussian09 suite of programs (revision D.01).<sup>S4</sup> Ground state optimizations were performed using the hybrid B3LYP functional;<sup>S5</sup> the 6-31G(2d,p) all-electron basis set<sup>S6</sup> was used for all C, H, B and P atoms, while a LanL2DZ effective core potential basis set<sup>S7</sup> was used for Sn [default parameters were used throughout]. The identity of minima was confirmed by the absence of imaginary vibrational frequencies in each case. The stabilization energy associated with the B-H...Sn interactions was calculated using the NBODE1 routine, in which the elements affording this interaction were selectively deleted.<sup>S8</sup> Natural Bond Orbital analyses were performed using the NBO 3.1 module of Gaussian09.<sup>S9</sup>

## 2.2 Final atomic coordinates for 5':

| Center Number | Atomic Number | Atomic Type | Coordinates (Angstroms) |           |           |
|---------------|---------------|-------------|-------------------------|-----------|-----------|
|               |               |             | X                       | Y         | Z         |
| 1             | 50            | 0           | -0.520509               | 0.044212  | 0.140892  |
| 2             | 50            | 0           | 1.778635                | -1.335642 | 1.395920  |
| 3             | 15            | 0           | -2.682663               | 0.676651  | 2.611073  |
| 4             | 15            | 0           | -1.428626               | -3.002961 | -0.915483 |
| 5             | 15            | 0           | -0.256493               | 2.772255  | -2.128879 |
| 6             | 15            | 0           | 4.556608                | -1.023596 | -0.652267 |
| 7             | 5             | 0           | -2.615688               | -1.129347 | 3.287930  |
| 8             | 1             | 0           | -2.713899               | -1.002777 | 4.488084  |
| 9             | 1             | 0           | -1.533318               | -1.575507 | 2.960268  |
| 10            | 1             | 0           | -3.553028               | -1.716677 | 2.796702  |
| 11            | 5             | 0           | 0.479971                | -3.347373 | -0.802185 |
| 12            | 1             | 0           | 0.666699                | -4.536606 | -0.809680 |
| 13            | 1             | 0           | 0.996257                | -2.749201 | -1.714014 |
| 14            | 1             | 0           | 0.870003                | -2.925813 | 0.311827  |
| 15            | 5             | 0           | -1.522167               | 4.028379  | -1.352413 |
| 16            | 1             | 0           | -2.452147               | 3.364589  | -0.952288 |
| 17            | 1             | 0           | -0.984278               | 4.682433  | -0.491583 |
| 18            | 1             | 0           | -1.827146               | 4.690532  | -2.322820 |
| 19            | 5             | 0           | 5.658411                | -1.561039 | 0.848354  |
| 20            | 1             | 0           | 6.036773                | -0.571369 | 1.429827  |
| 21            | 1             | 0           | 4.949005                | -2.276686 | 1.525513  |
| 22            | 1             | 0           | 6.564548                | -2.168965 | 0.318811  |
| 23            | 6             | 0           | -2.431772               | 0.916424  | 0.801448  |
| 24            | 1             | 0           | -2.383976               | 1.999026  | 0.637931  |
| 25            | 6             | 0           | -3.485271               | 0.325038  | -0.131091 |
| 26            | 6             | 0           | -4.778906               | 0.873122  | -0.147257 |
| 27            | 1             | 0           | -5.008935               | 1.695151  | 0.520538  |
| 28            | 6             | 0           | -5.761054               | 0.420637  | -1.021383 |
| 29            | 1             | 0           | -6.748713               | 0.870867  | -1.005328 |
| 30            | 6             | 0           | -5.458881               | -0.587993 | -1.933081 |
| 31            | 1             | 0           | -6.207483               | -0.939360 | -2.636451 |
| 32            | 6             | 0           | -4.174340               | -1.119881 | -1.958517 |
| 33            | 1             | 0           | -3.926247               | -1.863851 | -2.708458 |
| 34            | 6             | 0           | -3.174798               | -0.691352 | -1.068581 |
| 35            | 6             | 0           | -1.756545               | -1.222702 | -1.193386 |
| 36            | 1             | 0           | -1.376346               | -1.057092 | -2.210002 |

|    |   |   |           |           |           |
|----|---|---|-----------|-----------|-----------|
| 37 | 6 | 0 | -4.237564 | 1.516459  | 3.112296  |
| 38 | 1 | 0 | -4.275848 | 2.551206  | 2.760251  |
| 39 | 6 | 0 | -1.398543 | 1.756123  | 3.351930  |
| 40 | 1 | 0 | -1.560744 | 1.795752  | 4.432264  |
| 41 | 6 | 0 | -2.080225 | -3.980190 | -2.328043 |
| 42 | 1 | 0 | -3.167817 | -3.911094 | -2.396690 |
| 43 | 6 | 0 | -2.403736 | -3.581097 | 0.509170  |
| 44 | 1 | 0 | -2.125659 | -3.037180 | 1.414055  |
| 45 | 6 | 0 | 0.633678  | 1.498083  | -1.137632 |
| 46 | 1 | 0 | 1.050480  | 0.824859  | -1.896838 |
| 47 | 6 | 0 | 1.736986  | 1.978280  | -0.219915 |
| 48 | 6 | 0 | 1.687015  | 3.257065  | 0.356614  |
| 49 | 1 | 0 | 0.865113  | 3.917805  | 0.103108  |
| 50 | 6 | 0 | 2.647274  | 3.700398  | 1.263222  |
| 51 | 1 | 0 | 2.572077  | 4.700323  | 1.679283  |
| 52 | 6 | 0 | 3.682360  | 2.850601  | 1.637489  |
| 53 | 1 | 0 | 4.433371  | 3.170871  | 2.352883  |
| 54 | 6 | 0 | 3.749240  | 1.570425  | 1.095231  |
| 55 | 1 | 0 | 4.553856  | 0.909441  | 1.401115  |
| 56 | 6 | 0 | 2.809185  | 1.106151  | 0.152063  |
| 57 | 6 | 0 | 2.889715  | -0.312474 | -0.341827 |
| 58 | 1 | 0 | 2.320642  | -0.467302 | -1.259017 |
| 59 | 6 | 0 | 1.061823  | 3.623185  | -3.087044 |
| 60 | 1 | 0 | 0.594912  | 4.322185  | -3.785808 |
| 61 | 6 | 0 | -1.124507 | 1.780307  | -3.403123 |
| 62 | 1 | 0 | -1.956183 | 1.242240  | -2.942667 |
| 63 | 6 | 0 | 5.404735  | 0.141659  | -1.792988 |
| 64 | 1 | 0 | 4.814610  | 0.316922  | -2.696976 |
| 65 | 6 | 0 | 4.193885  | -2.473487 | -1.711248 |
| 66 | 1 | 0 | 5.143890  | -2.925691 | -2.007102 |
| 67 | 1 | 0 | 3.625548  | -2.195091 | -2.602674 |
| 68 | 1 | 0 | 3.623147  | -3.211778 | -1.143674 |
| 69 | 1 | 0 | 6.377416  | -0.277003 | -2.065355 |
| 70 | 1 | 0 | 5.566499  | 1.091935  | -1.279298 |
| 71 | 1 | 0 | 1.699824  | 4.186452  | -2.403092 |
| 72 | 1 | 0 | 1.676594  | 2.906123  | -3.638582 |
| 73 | 1 | 0 | -0.453578 | 1.074208  | -3.901351 |
| 74 | 1 | 0 | -1.538597 | 2.469291  | -4.143691 |
| 75 | 1 | 0 | -1.795892 | -5.025921 | -2.182881 |
| 76 | 1 | 0 | -1.630247 | -3.626212 | -3.259285 |
| 77 | 1 | 0 | -2.205018 | -4.646430 | 0.654579  |
| 78 | 1 | 0 | -3.470427 | -3.428182 | 0.327112  |
| 79 | 1 | 0 | -4.283934 | 1.503245  | 4.204964  |
| 80 | 1 | 0 | -5.096548 | 0.962587  | 2.729377  |
| 81 | 1 | 0 | -0.406140 | 1.333919  | 3.175626  |
| 82 | 1 | 0 | -1.438955 | 2.768302  | 2.939697  |

-----  
Final energy for 5': -2415.14715465 au

NIMAG = 0

### 2.3 Final atomic coordinates for *rac-6'*:

| Center<br>Number | Atomic<br>Number | Atomic<br>Type | Coordinates (Angstroms) |           |           |
|------------------|------------------|----------------|-------------------------|-----------|-----------|
|                  |                  |                | X                       | Y         | Z         |
| 1                | 50               | 0              | -0.077862               | -1.716272 | -0.054014 |
| 2                | 15               | 0              | -2.811119               | -0.158500 | 0.173719  |
| 3                | 15               | 0              | 2.893682                | -0.279771 | -0.022148 |

|    |   |   |           |           |           |
|----|---|---|-----------|-----------|-----------|
| 4  | 5 | 0 | -2.218990 | -0.709244 | 1.932039  |
| 5  | 1 | 0 | -3.086113 | -1.277504 | 2.541021  |
| 6  | 1 | 0 | -1.707186 | 0.230234  | 2.480577  |
| 7  | 1 | 0 | -1.329376 | -1.568284 | 1.666891  |
| 8  | 5 | 0 | 3.630942  | -2.017556 | 0.386485  |
| 9  | 1 | 0 | 4.733156  | -2.015258 | -0.117716 |
| 10 | 1 | 0 | 3.652333  | -2.083529 | 1.596438  |
| 11 | 1 | 0 | 2.883011  | -2.827194 | -0.122188 |
| 12 | 6 | 0 | -1.311768 | 0.074087  | -0.830069 |
| 13 | 1 | 0 | -1.570530 | 0.029822  | -1.893902 |
| 14 | 6 | 0 | -0.573987 | 1.347101  | -0.465259 |
| 15 | 6 | 0 | -1.045632 | 2.597042  | -0.902343 |
| 16 | 1 | 0 | -1.886399 | 2.630230  | -1.590327 |
| 17 | 6 | 0 | -0.478424 | 3.786474  | -0.456553 |
| 18 | 1 | 0 | -0.864489 | 4.739194  | -0.806250 |
| 19 | 6 | 0 | 0.564613  | 3.741465  | 0.468438  |
| 20 | 1 | 0 | 0.989723  | 4.659763  | 0.862198  |
| 21 | 6 | 0 | 1.073293  | 2.510908  | 0.872188  |
| 22 | 1 | 0 | 1.891985  | 2.483035  | 1.583660  |
| 23 | 6 | 0 | 0.558284  | 1.299758  | 0.377961  |
| 24 | 6 | 0 | 1.218712  | -0.026288 | 0.694460  |
| 25 | 1 | 0 | 1.349348  | -0.181664 | 1.772896  |
| 26 | 6 | 0 | -3.780940 | -1.458305 | -0.679002 |
| 27 | 1 | 0 | -4.026384 | -1.155515 | -1.701001 |
| 28 | 6 | 0 | -3.936516 | 1.288716  | 0.183341  |
| 29 | 1 | 0 | -4.792362 | 1.059064  | 0.825388  |
| 30 | 6 | 0 | 4.028796  | 1.070455  | 0.492589  |
| 31 | 1 | 0 | 3.686043  | 2.053820  | 0.165671  |
| 32 | 6 | 0 | 2.703346  | 0.017163  | -1.824677 |
| 33 | 1 | 0 | 2.114352  | -0.789406 | -2.272504 |
| 34 | 1 | 0 | 5.009292  | 0.860147  | 0.055818  |
| 35 | 1 | 0 | 4.132645  | 1.058955  | 1.580861  |
| 36 | 1 | 0 | 3.692624  | -0.000818 | -2.289366 |
| 37 | 1 | 0 | 2.220804  | 0.976381  | -2.028711 |
| 38 | 1 | 0 | -4.704317 | -1.637917 | -0.122184 |
| 39 | 1 | 0 | -3.209675 | -2.389485 | -0.709189 |
| 40 | 1 | 0 | -3.410166 | 2.152319  | 0.593753  |
| 41 | 1 | 0 | -4.292062 | 1.523822  | -0.823780 |

-----  
Final energy for *rac-6'*: -1207.56152326 au

NIMAG = 0

## 2.4 Final atomic coordinates for *meso-6'*:

| Center<br>Number | Atomic<br>Number | Atomic<br>Type | Coordinates (Angstroms) |           |           |
|------------------|------------------|----------------|-------------------------|-----------|-----------|
|                  |                  |                | X                       | Y         | Z         |
| 1                | 50               | 0              | 0.133001                | -1.586371 | -0.857884 |
| 2                | 15               | 0              | 2.575517                | -0.262686 | 0.697966  |
| 3                | 15               | 0              | -2.714362               | -0.393344 | 0.554174  |
| 4                | 5                | 0              | 1.394390                | -1.110133 | 1.972582  |
| 5                | 1                | 0              | 1.975736                | -1.897723 | 2.670613  |
| 6                | 1                | 0              | 0.598503                | -1.756954 | 1.236293  |
| 7                | 1                | 0              | 0.786204                | -0.250563 | 2.554343  |
| 8                | 5                | 0              | -3.022821               | -2.298514 | 0.499597  |
| 9                | 1                | 0              | -3.956495               | -2.524200 | 1.236190  |
| 10               | 1                | 0              | -3.259122               | -2.540782 | -0.666658 |
| 11               | 1                | 0              | -1.984138               | -2.803644 | 0.881623  |

|    |   |   |           |           |           |
|----|---|---|-----------|-----------|-----------|
| 12 | 6 | 0 | 1.573401  | 0.212705  | -0.736162 |
| 13 | 1 | 0 | 2.226353  | 0.285602  | -1.613963 |
| 14 | 6 | 0 | 0.742043  | 1.473271  | -0.580745 |
| 15 | 6 | 0 | 1.365654  | 2.732476  | -0.589014 |
| 16 | 1 | 0 | 2.446298  | 2.781149  | -0.689000 |
| 17 | 6 | 0 | 0.637858  | 3.913765  | -0.493254 |
| 18 | 1 | 0 | 1.148963  | 4.871709  | -0.502317 |
| 19 | 6 | 0 | -0.750955 | 3.852373  | -0.400889 |
| 20 | 1 | 0 | -1.339454 | 4.762737  | -0.337238 |
| 21 | 6 | 0 | -1.386113 | 2.614538  | -0.417766 |
| 22 | 1 | 0 | -2.469377 | 2.582470  | -0.395301 |
| 23 | 6 | 0 | -0.668013 | 1.409971  | -0.503456 |
| 24 | 6 | 0 | -1.373977 | 0.070000  | -0.613543 |
| 25 | 1 | 0 | -1.877680 | 0.004736  | -1.592163 |
| 26 | 6 | 0 | 3.570440  | 1.099382  | 1.420766  |
| 27 | 1 | 0 | 4.289511  | 1.496699  | 0.699050  |
| 28 | 6 | 0 | 3.832761  | -1.420638 | 0.039835  |
| 29 | 1 | 0 | 4.467298  | -1.764613 | 0.860632  |
| 30 | 6 | 0 | -4.257002 | 0.518081  | 0.125761  |
| 31 | 1 | 0 | -4.186900 | 1.593264  | 0.304286  |
| 32 | 6 | 0 | -2.276493 | 0.257955  | 2.205198  |
| 33 | 1 | 0 | -1.371858 | -0.237347 | 2.561372  |
| 34 | 1 | 0 | -5.064588 | 0.107853  | 0.739061  |
| 35 | 1 | 0 | -4.503614 | 0.337164  | -0.923836 |
| 36 | 1 | 0 | -3.097527 | 0.027206  | 2.889590  |
| 37 | 1 | 0 | -2.111654 | 1.337919  | 2.180816  |
| 38 | 1 | 0 | 4.107834  | 0.713011  | 2.292251  |
| 39 | 1 | 0 | 2.902664  | 1.899127  | 1.747234  |
| 40 | 1 | 0 | 3.338413  | -2.289783 | -0.401265 |
| 41 | 1 | 0 | 4.451802  | -0.936111 | -0.720773 |

-----  
Final energy of *meso-6'*: -1207.55994283 au

NIMAG = 0

#### References:

- S1 K. Izod, C. M. Dixon, E. McMeekin, L. Rodgers, R. W. Harrington and U. Baisch, *Organometallics*, 2014, **33**, 378.
- S2 E. O. Fischer and H. Grubert, *Z. Naturforsch. B*, 1956, **11**, 423.
- S3 (a) *CrysAlisPro*; Oxford Diffraction Ltd, Oxford, UK, 2008. (b) G. M. Sheldrick, *Acta Crystallogr., Sect. A* 2008, **64**, 112. (c) , O. V. Dolomanov, L. J. Bourhis, R. J. Gildea, J. A. K. Howard, H. Puschmann, *J. Appl. Cryst.*, 2009, **42**, 339.
- S4 Gaussian 09, Revisions B.01, C.01 and D.01, M. J. Frisch, G. W. Trucks, H. B. Schlegel, G. E. Scuseria, M. A. Robb, J. R. Cheeseman, G. Scalmani, V. Barone, B. Mennucci, G. A. Petersson, H. Nakatsuji, M. Caricato, X. Li, H. P. Hratchian, A. F. Izmaylov, J. Bloino, G. Zheng, J. L. Sonnenberg, M. Hada, M. Ehara, K. Toyota, R. Fukuda, J. Hasegawa, M. Ishida, T. Nakajima, Y. Honda, O. Kitao, H. Nakai, T. Vreven, J. A. Montgomery, Jr., J. E. Peralta, F. Ogliaro, M. Bearpark, J. J. Heyd, E. Brothers, K. N. Kudin, V. N. Staroverov, R. Kobayashi, J. Normand, K. Raghavachari, A. Rendell, J. C. Burant, S. S. Iyengar, J. Tomasi, M. Cossi, N. Rega, J. M. Millam, M. Klene, J. E. Knox, J. B. Cross, V. Bakken, C. Adamo, J. Jaramillo, R. Gomperts, R. E. Stratmann, O. Yazyev, A. J. Austin, R. Cammi, C. Pomelli, J. W. Ochterski, R. L. Martin, K. Morokuma, V. G. Zakrzewski, G. A. Voth, P. Salvador, J. J. Dannenberg, S. Dapprich, A. D. Daniels, Ö. Farkas, J. B. Foresman, J. V. Ortiz, J. Cioslowski, D. J. Fox, Gaussian, Inc., Wallingford CT, 2009.

- S5 (a) A. D. Becke *J. Chem. Phys.* 1993, **98**, 5648. (b) P. J. Stephens, F. J. Devlin, C. F. Chablowski, M. J. Frisch, *J. Phys. Chem.* 1994, **98**, 11623. (c) R. H. Hertwig, W. Koch, *Chem. Phys. Lett.* 1997, **268**, 345.
- S6 (a) P.C. Hariharan, J.A. Pople, *Theoret. Chim. Acta* 1973, **28**, 213. (b) M.M. Francl, W.J. Pietro, W.J. Hehre, J.S. Binkley, M.S. Gordon, D.J. DeFrees, J.A. Pople, *J. Chem. Phys.* 1982, **77**, 3654.
- S7 (a) P. J. Hay, W. R. Wadt, *J. Chem. Phys.* 1985, **82**, 270. (b) W. R. Wadt, P. J. Hay, *J. Chem. Phys.* 1985, **82**, 284. (c) P. J. Hay, W. R. Wadt, *J. Chem. Phys.* 1985, **82**, 299.
- S8 M. W. Wong, *Chem. Phys. Lett.* 1996, **256**, 391.
- S9 (a) NBO Version 3.1, E. D. Glendening, A. E. Reed, J. E. Carpenter, F. Weinhold. (b) J. E. Carpenter, F. Weinhold, *J. Mol. Struct. (Theochem)* 1988, **169**, 41. (c) J. E. Carpenter, PhD thesis, University of Wisconsin, Madison, WI, 1987. (d) J. P. Foster, F. Weinhold, *J. Am. Chem. Soc.* 1980, **102**, 7211. (e) A. E. Reed, F. Weinhold, *J. Chem. Phys.* 1983, **78**, 4066. (f) A. E. Reed, F. Weinhold, *J. Chem. Phys.* 1983, **81**, 1736. (g) A. E. Reed, R. B. Weinstock, F. Weinhold, *J. Chem. Phys.* 1985, **83**, 735. (h) A. E. Reed, L. A. Curtiss, F. Weinhold, *Chem. Rev.* 1988, **88**, 899.
